# Supplementary material
Source: publisher site journal article supplement (https://www.degruyterbrill.com/publication/journal_key/IJCRE/downloadAsset/IJCRE_Special%20Issue%20IEC%202025.docx)
Supplement: Supplementary file 1 [file IJCRE_Special%20Issue%20IEC%202025.docx]

**Special Issue to be Published in the IJCRE (International Journal of Chemical Reaction Engineering)** **On the Occasion of the 2025–6th International Energy Conference Held in Mexico from September 22–26, 2025**

We are pleased to announce the call for manuscripts for the 2025 Special Issue of the International Journal of Chemical Reaction Engineering (IJCRE), to be published in conjunction with the 6th International Energy Conference (IEC) to be held in Mexico from September 22–26, 2025.

[Submit here: http://www.degruyter.com/view/j/ijcre](file:///C:\Users\mac2021\Downloads\Submit%20here:%20http:\www.degruyter.com\view\j\ijcre)

All manuscripts submitted for the Special Issue will undergo peer review prior to acceptance for publication.

Deadline for the submission of the article to IJCRE: **May 30, 2026.**

**Submission Requirements:**

- Submissions must be in final manuscript form.
- Each manuscript must include the names of at least **four proposed reviewers**, specifying the following for each:
  - Full name
  - Institution
  - Researcher role (e.g., professor, research associate, postdoctoral fellow, graduate student)
  - Justification for selection (e.g., recent relevant publications)

When submitting your manuscript, please be sure to select the folder titled:
**“Special Issue for the 2025–6th IEC Mexico.”**

**Guest Editors:**

- Dr. Carlos Omar Castillo Araiza (carlos.castilloaraiza@gmail.com)
- Dr. Margarita González Brambila (margarita.gonzalezbrambila@gmail.com)
- Dr. José Antonio Colín Luna (jacl@azc.uam.mx)

All editors are affiliated with Universidad Autónoma Metropolitana. For questions regarding manuscript suitability or other inquiries, please feel free to contact them directly.

Thank you for your interest in submitting your work to the **2025–6th IEC–IJCRE Special Issue**.
